# Supplementary material for: Optical Proxies of Euxinia: Spectroscopic Studies of CDOM, Chlorophyll, and Bacteriochlorophylls in the Lagoon on Zeleny Cape (the White Sea)
Source: MDPI journal article supplement (doi:10.3390/photonics10060672), 2023-06-09
Supplement: s1 [file s1]

## Optical proxies of euxinia: spectroscopic studies of CDOM, chlorophyll and bacteriochlorophylls in the Lagoon on Zeleny Cape (the White Sea)

Yu.G. Sokolovskaya (1), E.D. Krasnova (2), D.A. Voronov (3), Matorin D.N. (2), A.A. Zhiltsova (1), S.V. Patsaeva (1)

(1) Faculty of Physics, Lomonosov Moscow State University, Moscow 119992, Russia;

(2) Department of Biology, Moscow State University, Moscow 119992, Russia;

(3) Kharkevich Institute for Information Transmission Problems, Russian Academy of Sciences, Moscow, Russia.

### Supplementary Material

#### Correlation between the CDOM absorbances and water salinity in surface waters

If we take filtered samples from the mixolimnion zone from different water bodies of the Karelian coast, then in general we get an inverse relationship CDOM absorbances ( $A_{350}$  and  $A_{380}$ ) and water salinity. The values of water salinity in the studied samples varied from 0 to 26‰ with an average of  $(12 \pm 4)$  ‰ and a median of 9.4‰. The  $R^2$ -coefficient for filtered samples was 0.984 with a negative slope of the line (Figure S1).

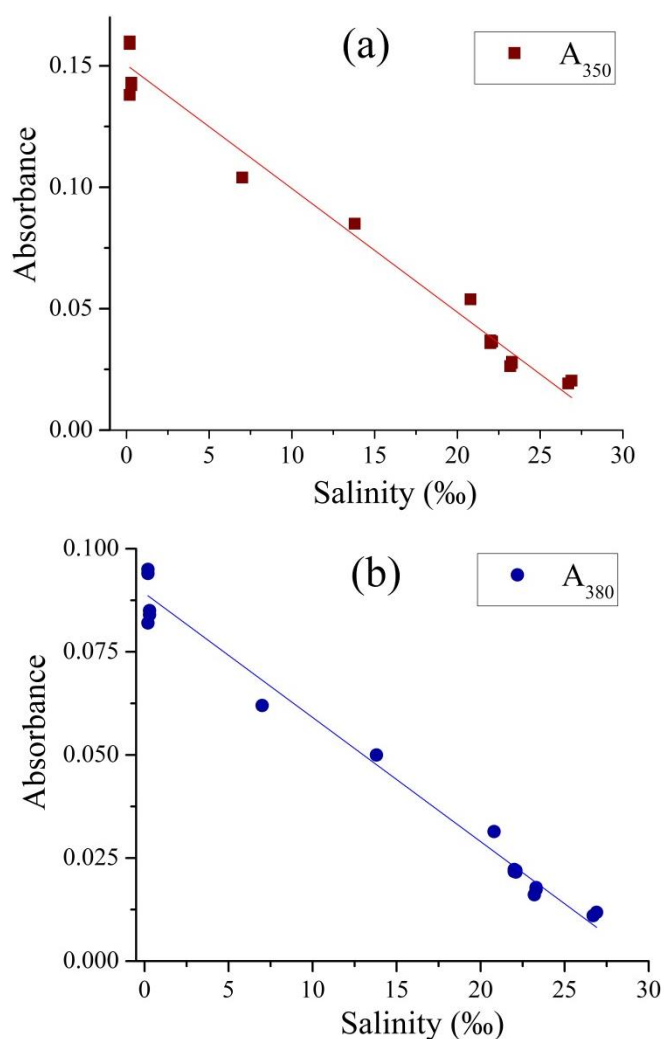

Figure S1. Dependence of salinity and absorbances in filtered samples at 350 nm ( $A_{350}$ ) (a) and 380 nm ( $A_{380}$ ) (b) for the surface waters of the studied meromictic water bodies.
